# 1 Testing the Tea Bag Index as a potential indicator for assessing litter decomposition in aquatic 2 ecosystems

3  
4 Taiki Mori<sup>a\*</sup>, Kenji Ono<sup>b</sup>, Yoshimi Sakai<sup>a</sup>

5  
6 <sup>a</sup>Kyushu Research Center, Forestry and Forest Products Research Institute, FFPRI, Kurokami 4-11-  
7 16, Kumamoto, 860-0862, Japan

8 <sup>b</sup>Tohoku Research Center, Forestry and Forest Products Research Institute, FFPRI, Nabeyashiki 92-  
9 25, Shimokuriyagawa, Morioka, Iwate, 020-0123, Japan

10  
11  
12 \*Corresponding author

13 Dr. Taiki Mori: taikimori7@gmail.com

## 14 15 Abstract

16 The Tea Bag Index (TBI) approach is a standardized method for assessing litter decomposition in  
17 terrestrial ecosystems. This method allows determination of the stabilized portion of the hydrolysable  
18 fraction during the decomposition process, and derivation of a decomposition constant ( $k$ ) using single  
19 measurements of the mass-loss ratios of green and rooibos teas. Although this method is being applied  
20 to aquatic systems, it has not been validated in these environments, where initial leaching tends to be  
21 higher than in terrestrial ecosystems. Here, we first validated a critical assumption of the TBI method  
22 that green tea decomposition plateaus during the standard incubation period of 90 days, and then tested  
23 the accuracy of a TBI-based asymptote model using a second model obtained from fitting actual  
24 decomposition data. Validation data were obtained by incubating tea bags in water samples taken from  
25 a stream, a pond, and the ocean in Kumamoto, Japan. We found that green tea decomposition did not  
26 plateau during the 90-day period, contradicting a key assumption of the TBI method. Moreover, the  
27 TBI-based asymptote models disagreed with actual decomposition data. Subtracting the leachable  
28 fraction from the initial tea mass improved the TBI-based model, but discrepancies with the actual  
29 decomposition data remained. Thus, we conclude that the TBI approach, which was developed for a  
30 terrestrial environment, is not appropriate for aquatic ecosystems. However, the use of tea bags as a  
31 standard material in assessments of aquatic litter decomposition remains beneficial.

32  
33 **Keywords:** *aquatic environment; asymptote model; decomposition; decomposition constant  $k$ ;*  
34 *stabilization factor  $S$ ; Tea Bag Index*

## 35 36 Introduction

37 Litter decomposition is an important process in aquatic systems (Graça et al., 2015), playing a major  
38 role in the global cycling of carbon and nutrients (Battin et al., 2009; Gessner et al., 1999; Graça et al.,  
39 2015). Three main factors control aquatic litter decomposition: litter quality (Jabiol et al., 2019; Neiff  
40 et al., 2006); environmental factors such as temperature, nutrient availability, salinity, acidity, and  
41 oxygen concentration (Almeida Júnior et al., 2020; Ferreira et al., 2015; Gomes et al., 2018; Griffiths  
42 and Tiegs, 2016; Woodward et al., 2012; Young et al., 2008); and decomposer community composition,  
43 including macroinvertebrates, fungi, and bacteria (Balibrea et al., 2020; Hieber and Gessner, 2002).

44 Litter bags filled with litter from the local area are often used to assess litter decomposition  
45 rates in aquatic systems. However, understanding the impacts of environmental changes on litter  
46 decomposition rates at large geographical scales requires a standardized method (Keuskamp et al.,  
47 2013; Mori et al., 2021a), because high local variation in litter quality may negate the influence of  
48 environmental effects. A standardized method applicable to both aquatic and terrestrial ecosystems  
49 would be beneficial (Seelen et al., 2019), because integrated models of both terrestrial and aquatic  
50 systems remain poor (García-Palacios et al., 2016).

51 The Tea Bag Index (TBI) approach proposed by Keuskamp et al. (2013) is a standardized  
52 method for assessing litter decomposition that was developed in a terrestrial ecosystem. This method  
53 uses two types of commercially available tea bags (green and rooibos teas, Lipton) as standard  
54 materials to calculate the TBI, which consists of two parameters: a stabilization factor  $S$  (the stabilized  
55 portion of the hydrolysable fraction during decomposition) and the decomposition constant  $k$  of an  
56 asymptote model (Keuskamp et al., 2013). Due to its cost-effectiveness and ability to collect  
57 comparable globally distributed data (Keuskamp et al., 2013), multiple studies have used the TBI  
58 (Becker and Kuzyakov, 2018; Fanin et al., 2020; Fujii et al., 2017; Mori et al., 2021b; Mueller et al.,  
59 2018; Petraglia et al., 2019).

60 Calculation of the TBI rests on several assumptions.  $S$  is calculated as the ratio between the  
61 mass of hydrolysable fraction of green tea remaining at the end of the 90-day standard incubation  
62 period and the entire hydrolysable fraction of green tea (0.842; Keuskamp et al. 2013); this assumes  
63 that the decomposition of the acid-insoluble fraction of green tea is negligible, and that the  
64 undecomposed hydrolysable fraction stabilizes and transforms to a recalcitrant fraction within the  
65 incubation period. Thus, the decomposition curve of green tea must reach a plateau before the end of  
66 the incubation period, given that the decomposition and stabilization of the hydrolysable fraction  
67 should be completed within this period. Next, the decomposition constant ( $k$ ) is determined by fitting  
68 an asymptote model to rooibos tea decomposition data using the following formula:

$$69 \quad W_r(t) = a_r * e^{-kt} + (1 - a_r) \quad \text{eq. 1}$$

70 where  $W_r(t)$  is the ratio of the remaining mass of rooibos tea after the incubation period  $t$  relative to  
71 the initial mass,  $k$  is a decomposition constant,  $a_r$  is the decomposable fraction, and  $1 - a_r$  is the  
72 undecomposable fraction of rooibos tea (Keuskamp et al., 2013). The TBI approach allows

73 parameterization of the asymptote model without fitting the model to time series data of rooibos tea  
74 decomposition by determining  $a_r$  using green tea decomposition data. Because the TBI approach  
75 assumes that the acid-insoluble fraction does not degrade within a 90-day period,  $a_r$  represents the  
76 decomposable hydrolysable fraction (1 – acid-insoluble fraction) of rooibos tea. Under the assumption  
77 that the ratio of the decomposable hydrolysable fraction to the total hydrolysable fraction of rooibos  
78 tea is the same as that of green tea,  $a_r$  can be calculated as the total hydrolysable fraction (0.552;  
79 Keuskamp et al. 2013) multiplied by (1 –  $S$ ). The decomposition constant  $k$  can be determined by  
80 substituting the values obtained from a single measurement of rooibos tea decomposition for the  
81 parameters in eq. 1 (i.e.,  $t$  is 90 and  $W_r(t)$  is the remaining-mass ratio of rooibos tea at the end of the  
82 incubation period).

83         Although the TBI method was developed in a terrestrial ecosystem, it has increasingly been  
84 adopted in aquatic environments (Hunter et al., 2019), including mangrove systems (Mueller et al.,  
85 2018), marshes (Mueller et al., 2018; Yousefi Lalimi et al., 2018), and streams (Peralta-Maraver et al.,  
86 2019). In these studies, the TBI was calculated following the protocol of Keuskamp et al. (2013),  
87 which assumes that the index can be applied equivalently in terrestrial and aquatic ecosystems.  
88 However, the initial decomposition phase, i.e., leaching, is much more rapid in aquatic environments  
89 (Webster and Benfield, 1986), which could cause the TBI-based asymptote model to deviate from real-  
90 world decomposition (Seelen et al., 2019). In addition, the assumption that green tea decomposition  
91 plateaus during the incubation period has not been verified in an aquatic ecosystem (Keuskamp et al.,  
92 2013).

93         We first aimed to validate whether green tea decomposition does plateau during the 90-day  
94 incubation period, and then tested the accuracy of a TBI-based asymptote model by comparison with  
95 a model derived from actual decomposition data. Seelen et al. (2019) suggested that correcting the  
96 initial tea weights by subtracting the easily leachable fraction may provide a more accurate TBI in  
97 aquatic systems. However, the validity of this corrected approach was not evaluated using actual data.  
98 Therefore, we also evaluated a TBI-based model corrected by subtraction of the easily leachable  
99 fraction.

100

## 101 **Materials and methods**

### 102 *Incubation experiment*

103 We evaluated application of the TBI approach to aquatic ecosystems by monitoring the mass-loss  
104 ratios of green tea bags submerged in water. A microcosm approach (Santschi et al., 2018), rather than  
105 an *in-situ* approach, was used to control environmental variability as much as possible. We collected  
106 water samples for our experiment from three different sources: a stream running through an evergreen  
107 conifer plantation dominated by *Cryptomeria japonica* (Linnaeus f.) D. Don and *Chamaecyparis*  
108 *obtusa* (Sieb. et Zucc.) Endl. in Yamaga City, an artificial pond located at the Forestry and Forest

109 Products Research Institute (FFPRI) in Kyushu, and the ocean in Uki City. All three sites are located  
110 in Kumamoto Prefecture, Japan. Because the purpose of our study did not include investigating factors  
111 leading to differences in decomposition rates among the water samples, we did not perform chemical  
112 analyses of the water samples. Each of the three water samples was placed into eight plastic bottles  
113 (6.5 cm in diameter); four were assigned to green tea (EAN: 87 22700 05552 5, non-woven mesh,  
114 Lipton) and four to rooibos tea (EAN: 87 22700 18843 8, non-woven mesh, Lipton). We placed 200  
115 mL of water in each bottle and submerged five tea bags therein. We then covered the bottles with a  
116 polyethylene sheet to prevent evaporation (Mori et al., 2013). The bottles were incubated at 25°C in  
117 the dark. One tea bag per replicate was retrieved at 3, 11, 27, 55, and 91 days after the start of the  
118 incubation period, whereupon weights were determined by oven drying at 70°C for 72 h.

119

#### 120 *Calculating TBI*

121 The TBI was calculated following Keuskamp et al. (2013).  $S$  was calculated as:

$$122 \quad S = 1 - a_g / H_g \quad \text{eq. 2}$$

123 where  $a_g$  is the mass loss of green tea during the 90-day period (note that we used 91 days) and  $H_g$   
124 (0.842) is the hydrolysable fraction of green tea (Keuskamp et al. 2013). Assuming that the  $S$  value of  
125 rooibos tea is the same as that of green tea, the decomposable fraction of rooibos tea was calculated  
126 as:

$$127 \quad a_r = H_r * (1 - S) \quad \text{eq. 3}$$

128 where  $H_r$  (0.552) is the hydrolysable fraction of rooibos tea (Keuskamp et al. 2013). The  
129 decomposition constant ( $k$ ) was determined from an asymptote model of rooibos tea decomposition:

$$130 \quad W_r(t) / W_r(0) = a_r * e^{-kt} + (1 - a_r) \quad \text{eq. 1'}$$

131 where  $W_r(t)$  and  $W_r(0)$  are the mass of rooibos tea remaining after the incubation time and that before  
132 the incubation time  $t$ , respectively.

133

#### 134 *Leaching factor correction*

135 Seelen et al. (2019) proposed correction of the TBI using a leaching factor, which was defined as the  
136 ratio of the easily leachable fraction to the total tea weight. Initial tea weight can then be corrected by  
137 multiplying the initial tea mass by (1 – the leaching factor). Accordingly, all remaining mass values  
138 and hydrolysable fractions of both the green and rooibos teas ( $H_g$  and  $H_r$ ) were corrected by subtracting  
139 the leaching factor and dividing the result by (1 – the leaching factor). The TBI and the TBI-based  
140 asymptote model were then calculated using the corrected data.

141 Seelen et al. (2019) suggested that a leaching factor be determined using mass loss data of  
142 both green and rooibos teas after submersion in water for 3 h. We chose to calculate a corrected TBI  
143 using several scenarios with different combinations of leaching factors for green and rooibos teas,  
144 rather than experimentally determining leaching loss in the manner suggested. We chose this approach

145 because it has been reported that leaching can occur for up to 72 and 48 hours in green and rooibos  
146 teas, respectively (Edwartz, 2018), and a long-term leaching experiment could overestimate the  
147 leaching factor due to microbial decomposition. In addition, solute concentration may influence initial  
148 leaching losses in tea, leading to differences between ecosystems and potential interactions with the  
149 teas' initial chemical composition. If the TBI is to be corrected by a leaching factor, then a global  
150 leaching factor would be most appropriate. Our approach therefore represents the first step toward a  
151 global leaching factor applicable to all aquatic environments. We created multiple scenarios, with a  
152 maximum leaching factor based on the mass loss of the teas on day 3 of incubation, assuming that  
153 leaching would be complete within 3 days and that the minimum leaching factor is 0, and intermediate  
154 values between the maximum leaching factor and zero, in our calculations of a corrected TBI.  
155 Asymptote models were constructed using the corrected TBI. We note that if a leaching factor is  
156 applied in assessments of aquatic litter decomposition, the results will not be comparable to those in  
157 terrestrial systems due to inherent differences in initial chemical compositions.

158

#### 159 *Leaching experiments*

160 We assessed tea leaching in deionized water and a tea solution to understand the influence of solute  
161 concentration on leaching. We used a tea solution rather than a salt solution to avoid any potential  
162 chemical reactions that could influence the leaching process. Solutions of both green and rooibos teas  
163 were prepared by submerging 10 tea bags in 600 mL of deionized water overnight. The deionized  
164 water and tea solutions were autoclaved at 120°C for 20 min for sterilization purposes. The autoclaved  
165 solutions were then placed in an incubator overnight at 25°C. Green and rooibos tea bags were then  
166 submerged into either the deionized water or tea solution, where green and rooibos tea bags were  
167 submerged in green and rooibos solutions, respectively, for 20 min or 9 h. The dry weights of the tea  
168 bags were then determined following oven drying at 70°C for 72 h.

169

#### 170 *TBI-based asymptote model in terrestrial systems*

171 As a reference, we calculated a decomposition curve based on a TBI-based asymptote model in a  
172 terrestrial ecosystem using published data (Keuskamp et al., 2013). These data, representing the  
173 outcomes of a laboratory incubation study conducted at 25°C, were obtained from Keuskamp et al.  
174 (2013) using the Data Thief 3.0 program (Tummers, 2006). We compared the TBI-based model to an  
175 asymptote model (eq. 1) that had been fitted to the time series data. Given that Keuskamp et al. (2013)  
176 did not collect remaining-mass observations on day 90 of incubation, the remaining mass of both green  
177 and rooibos teas at 90 days was calculated using the fitted asymptote model with a  $t$  of 90.

178

#### 179 *Statistical analyses*

180 All statistical analyses were performed using R software (R Core Team, 2019). The asymptote model

181 was fitted using nonlinear regression. Additionally, we fitted a double exponential model to the  
182 experimental data obtained from the stream- and pond-water samples using nonlinear regression. The  
183 model was expressed as:

$$184 \quad W(t) = a * e^{-k1t} + b * e^{-k2t} \quad \text{eq. 4}$$

185 where  $W(t)$  is the mass remaining after  $t$ ,  $k1$  and  $k2$  are decomposition constants, and  $a$  and  $b$  represent  
186 organic matter fractions differing in decomposability. A one-way ANOVA followed by Tukey's post  
187 hoc test was used to compare the remaining-mass ratios of the teas among the different water samples.  
188 Shapiro-Wilk tests showed that the data were not significantly different from a normal distribution,  
189 and log-transformation did not improve data fit; therefore, a normal distribution was assumed. The  
190 leaching losses of the two teas were analyzed using a two-way (time vs. solution) ANOVA. Data were  
191 log-transformed prior to this analysis.

192

## 193 **Results and Discussion**

### 194 *Effects of solute concentration on the teas' leaching losses*

195 We found that solute concentration, as well as soaking time, affected the leaching loss of both the  
196 green and rooibos teas (Fig. 1). The leaching loss of both teas was lower in tea solution compared to  
197 deionized water, and increased with increasing soaking time (Fig. 1a). This indicates that any leaching  
198 factor determined by submerging tea bags for several hours will be affected by solution concentration,  
199 including parameters such as dissolved organic carbon and salt concentrations. Therefore, it is difficult  
200 to determine an adequate leaching factor for the TBI method using a leaching experiment. We  
201 confirmed that our approach to determining leaching factors was appropriate, i.e., the use of multiple  
202 scenarios with different combinations, because leaching factors determined following several hours of  
203 submersion will likely change depending on solute concentration.

204

### 205 *Evaluating the stabilization factor in aquatic environments*

206 The remaining-mass ratios of the green tea samples at the end of the incubation period ranged from  
207 0.3 to 0.6 (Fig. 2a–c), values within the range of those reported from aquatic environments (Peralta-  
208 Maraver et al., 2019; Seelen et al., 2019; Lalimi et al., 2018). The asymptote model did not fit the  
209 time-series green tea decomposition data well, because green tea decomposition did not plateau during  
210 the incubation period, at least not in the stream and pond water samples (Fig. 2a, b). Rather, green tea  
211 mass continued to decline until the end of the incubation period (Fig. 2). This result disagrees with  
212 those from a terrestrial system, where decomposition was found to plateau within the same period (Fig.  
213 3a, Keuskamp et al. 2013). The continuous decline in mass therefore violates the plateau assumption  
214 of the TBI. This continuous decline was likely not due to slower overall decomposition rates in aquatic  
215 systems. In fact, the mass loss ratios of green tea in both the stream and pond samples were higher  
216 than those reported from terrestrial ecosystems (Djukic et al., 2018). We did not aim to investigate the



217 potential causes of the differences in green tea decomposition curves between aquatic and terrestrial  
218 systems, and thus cannot speculate further on this point. However, we clearly demonstrated that the  
219 standard protocol for the TBI method is not suitable for determining  $S$  in aquatic environments. The  
220 inclusion of a leaching factor provides a negligible improvement in model fit, because it does not  
221 eliminate the issue of a decreasing trend in green tea mass loss (Fig. S1).

222

### 223 *Evaluating the decomposition constant and TBI-based asymptote models in aquatic environments*

224 We found that  $k$  values determined using the TBI approach (0.0081, 0.013, and 0.0088 in stream, pond,  
225 and ocean samples, respectively) were at least one order of magnitude lower than those determined by  
226 fitting actual decomposition data (0.58, 0.33, and 0.72 in stream, pond, and ocean samples,  
227 respectively), indicating substantial disagreements between the TBI-based asymptote models and the  
228 models constructed using actual data (Fig. 2d–f). These results contrast with those obtained in a  
229 terrestrial ecosystem (Fig. 3b, Keuskamp et al. 2013), where these two models produced nearly  
230 identical results. We suggest that this discrepancy is the product of a violation of the assumption that  
231 the ratio of the decomposable to the total hydrolysable fraction is the same for rooibos and green tea.  
232 The decomposable hydrolysable fraction ( $a_r$ ) values determined by the TBI approach (0.46, 0.40, and  
233 0.29 in stream, pond, and ocean samples, respectively) were much larger than those obtained from the  
234 actual data-based model (0.21, 0.24, and 0.13 in stream, pond, and ocean samples, respectively). The  
235 fact that green tea decomposition did not reach a plateau, such that  $S$  may have been overestimated,  
236 was not the reason for the discrepancy, because the overestimation of  $S$  should cause an  
237 underestimation of  $a_r$  (see eq. 2). Therefore, compensating for any overestimation of  $S$  would widen  
238 the differences between the TBI-based model and actual-data-based model. Subtracting the leachable  
239 fraction from the initial tea mass, as proposed by Seelen et al. (2019), improved the TBI-based  
240 asymptote model (Fig. 4). A larger leaching factor reduced the discrepancy between the TBI-based  
241 model and actual-data-based model for rooibos tea (Fig. 4). However, excluding some cases with  
242 ocean water samples, wherein the leaching factors were 80% and 100% of the maximum (Fig. 4k, l),  
243 the discrepancy remained. Therefore, the TBI approach may overestimate the hydrolysable fraction of  
244 rooibos tea, leading to an underestimation of  $k$  in asymptote models. We note that the asymptote model  
245 did not fit the real-world data well, and the discrepancy between the two model types may therefore  
246 have been overestimated. However, considering that we could not determine  $S$ , and that under- or over  
247 estimation of  $S$  leads to incorrect estimation of  $k$  (Mori et al., 2021b), we concluded that the standard  
248 protocol used for the TBI method, which was developed in a terrestrial ecosystem, is not applicable to  
249 aquatic ecosystems.

250

### 251 *Future prospects for the use of the TBI method in aquatic environments*

252 Although the TBI may be an unsuitable index in aquatic ecosystems, this does not necessarily negate

253 the benefits of using tea bags as a standard material in assessments of litter decomposition rates in  
254 aquatic systems. For example, the remaining raw mass of both tea types could provide information on  
255 decomposition rates that is comparable on a global scale (Djukic et al., 2018). We found that the  
256 remaining mass of both teas following 91 days of incubation reflected the differences among the three  
257 water sample types used in this study (Fig. 5). This indicates that tea bags are sensitive enough to  
258 reflect differences in chemical composition and microbial community, both of which control litter  
259 decomposition (temperature was controlled in our study). Moreover, patterns in the remaining-mass  
260 ratios among the water sample types differed between the two tea types. The ratio was lowest in stream  
261 water for green tea and lowest in pond water for rooibos tea, although it was highest in ocean water  
262 for both types, likely because the high salt concentration inhibited decomposition (Contreras et al.,  
263 2017). Combining these two tea types could be advantageous for detecting differences in  
264 decomposition processes among different aquatic ecosystems.

265 In addition, tea bags could still be used as standard materials to obtain time-series data and  
266 fit models in assessments of decomposition rates. In this scenario, an alternative model type could also  
267 be selected, as the asymptote model may not fit such data best. For example, we fitted a double  
268 exponential model, which is a generalized version of an asymptote model (i.e., an asymptote model is  
269 a special case of the double exponential model where  $k_2 = 0$ ), and found improved fit relative to an  
270 asymptote model (Fig. 6). The AIC values resulting from double exponential models (-26.0, -28.3, -  
271 33.3, and -36.9 in green tea-stream, green tea-pond, rooibos tea-stream, and rooibos tea-pond,  
272 respectively) were lower than those from the asymptote model (-10.5, -12.9, -25.5, and -21.5 in green  
273 tea-stream, green tea-pond, rooibos tea-stream, and rooibos tea-pond, respectively). More complicated  
274 models, using more data with more frequent sampling and longer incubation periods, such as triple  
275 exponential models considering the decomposition of the acid-insoluble fraction, may provide  
276 important further information. This approach would negate a major advantage of the TBI method, i.e.,  
277 only a single measurement is required to determine an asymptote model, but it is still beneficial  
278 because tea bags reduce the labor of preparing litter bags and the materials are highly standardized,  
279 which enables comparison between studies. In conclusion, we have demonstrated that the TBI  
280 approach is not applicable to aquatic environments, but we nevertheless suggest that tea bags are  
281 beneficial for assessing aquatic litter decomposition, so their potential application should be further  
282 assessed.

283



284 **References**

- 285 Almeida Júnior, E.S., Martínez, A., Gonçalves, A.L., Canhoto, C., 2020. Combined effects of freshwater  
286 salinization and leaf traits on litter decomposition. *Hydrobiologia* 847, 3427–3435.  
287 <https://doi.org/10.1007/s10750-020-04348-1>
- 288 Balibrea, A., Ferreira, V., Balibrea, C., Gonçalves, V., Raposeiro, P.M., 2020. Contribution of  
289 macroinvertebrate shredders and aquatic hyphomycetes to litter decomposition in remote insular  
290 streams. *Hydrobiologia* 847, 2337–2355. <https://doi.org/10.1007/s10750-020-04259-1>
- 291 Battin, T.J., Luysaert, S., Kaplan, L.A., Aufdenkampe, A.K., Richter, A., Tranvik, L.J., 2009. The  
292 boundless carbon cycle. *Nat. Geosci.* 2, 598–600. <https://doi.org/10.1038/ngeo618>
- 293 Becker, J.N., Kuzyakov, Y., 2018. Teatime on Mount Kilimanjaro: Assessing climate and land-use effects  
294 on litter decomposition and stabilization using the Tea Bag Index. *L. Degrad. Dev.* 29, 2321–2329.  
295 <https://doi.org/10.1002/ldr.2982>
- 296 Contreras, L.M., Fierro-Cabo, A., Cintra-Buenrostro, C.E., 2017. Early drivers of Black Mangrove  
297 (*Avicennia germinans*) leaf litter decomposition in the water column. *Hydrobiologia* 803, 147–157.  
298 <https://doi.org/10.1007/s10750-017-3167-6>
- 299 Djukic, I., Kepfer-rojas, S., Kappel, I., Steenberg, K., Caliman, A., Paquette, A., Gutiérrez-girón, A.,  
300 Humber, A., Valdecantos, A., Petraglia, A., Alexander, H., Augustaitis, A., Saillard, A., Carolina, A.,  
301 Fernández, R., Sousa, A.I., Lillebø, A.I., Gripp, R., Quinde, J.D., Alatalo, J., Seeber, J., Stadler, J.,  
302 Kriiska, K., Coulibaly, K., Brigham, L.M., Brink, L. Van Den, Rustad, L., Zhang, L., Morillas, L.,  
303 Morley, M., Lebouvier, M., Tomaselli, M., Sternberg, M., Schaub, M., 2018. Early stage litter  
304 decomposition across biomes 629, 1369–1394. <https://doi.org/10.1016/j.scitotenv.2018.01.012>
- 305 Edwartz, J., 2018. Weight losses of Green tea and Rooibos tea in an aquatic environment.
- 306 Fanin, N., Bezaud, S., Sarneel, J.M., Cecchini, S., Nicolas, M., Augusto, L., 2020. Relative Importance of  
307 Climate, Soil and Plant Functional Traits During the Early Decomposition Stage of Standardized  
308 Litter. *Ecosystems* 23, 1004–1018. <https://doi.org/10.1007/s10021-019-00452-z>
- 309 Ferreira, V., Castagnyrol, B., Koricheva, J., Gulis, V., Chauvet, E., Graca, M.A.S., 2015. A meta-analysis  
310 of the effects of nutrient enrichment on litter decomposition in streams. *Biol. Rev.* 90, 669–688.  
311 <https://doi.org/10.1111/brv.12125>
- 312 Fujii, S., Mori, A.S., Koide, D., Makoto, K., Matsuoka, S., Osono, T., Isbell, F., 2017. Disentangling  
313 relationships between plant diversity and decomposition processes under forest restoration. *J. Appl.*  
314 *Ecol.* 54, 80–90. <https://doi.org/10.1111/1365-2664.12733>
- 315 García-Palacios, P., Mckie, B.G., Handa, I.T., Frainer, A., Hättenschwiler, S., 2016. The importance of  
316 litter traits and decomposers for litter decomposition: A comparison of aquatic and terrestrial  
317 ecosystems within and across biomes. *Funct. Ecol.* 30, 819–829. <https://doi.org/10.1111/1365-2435.12589>
- 318
- 319 Gessner, M.O., Chauvet, E., Dobson, M., 1999. A Perspective on Leaf Litter Breakdown in Streams. *Oikos*

- 320 85, 377. <https://doi.org/10.2307/3546505>
- 321 Gomes, P.P., Ferreira, V., Tonin, A.M., Medeiros, A.O., Júnior, J.F.G., 2018. Combined Effects of  
322 Dissolved Nutrients and Oxygen on Plant Litter Decomposition and Associated Fungal Communities.  
323 *Microb. Ecol.* 75, 854–862. <https://doi.org/10.1007/s00248-017-1099-3>
- 324 Graça, M.A.S., Ferreira, V., Canhoto, C., Encalada, A.C., Guerrero-Bolaño, F., Wantzen, K.M., Boyero,  
325 L., 2015. A conceptual model of litter breakdown in low order streams. *Int. Rev. Hydrobiol.* 100, 1–  
326 12. <https://doi.org/10.1002/iroh.201401757>
- 327 Griffiths, N.A., Tiegs, S.D., 2016. Organic-matter decomposition along a temperature gradient in a forested  
328 headwater stream. *Freshw. Sci.* 35, 518–533. <https://doi.org/10.1086/685657>
- 329 Hieber, M., Gessner, M.O., 2002. Contribution of Stream Detritivores, Fungi, and Bacteria to Leaf  
330 Breakdown Based on Biomass Estimates. *Ecology* 83, 1026. <https://doi.org/10.2307/3071911>
- 331 Hunter, W.R., Williamson, A., Sarneel, J.M., 2019. Using the Tea Bag Index to unravel how human  
332 pharmaceuticals affect aquatic microbial activity. <https://doi.org/10.1101/809426>
- 333 Jabiol, J., Lecerf, A., Lamothe, S., Gessner, M.O., Chauvet, E., 2019. Litter Quality Modulates Effects of  
334 Dissolved Nitrogen on Leaf Decomposition by Stream Microbial Communities. *Microb. Ecol.* 959–  
335 966. <https://doi.org/10.1007/s00248-019-01353-3>
- 336 Keuskamp, J.A., Dingemans, B.J.J., Lehtinen, T., Sarneel, J.M., Hefting, M.M., 2013. Tea Bag Index: A  
337 novel approach to collect uniform decomposition data across ecosystems. *Methods Ecol. Evol.* 4,  
338 1070–1075. <https://doi.org/10.1111/2041-210X.12097>
- 339 Mori, T., Aoyagi, R., Taga, H., Sakai, Y., 2021a. Effects of water content and mesh size on tea bag  
340 decomposition. *Ecologies* 2, 175–186. <https://doi.org/10.1101/2020.11.15.384016>
- 341 Mori, T., Hashimoto, T., Sakai, Y., 2021b. Evaluating the tea bag method as a potential tool for detecting  
342 the effects of added nutrients and their interactions with climate on litter decomposition. bioRxiv doi:  
343 <https://doi.org/10.1101/2021.01.28.428520>.
- 344 Mori, T., Ohta, S., Ishizuka, S., Konda, R., Wicaksono, A., Heriyanto, J., Hardjono, A., 2013. Effects of  
345 phosphorus addition with and without ammonium, nitrate, or glucose on N<sub>2</sub>O and NO emissions from  
346 soil sampled under Acacia mangium plantation and incubated at 100 % of the water-filled pore space.  
347 *Biol. Fertil. Soils* 49, 13–21. <https://doi.org/10.1007/s00374-012-0690-5>
- 348 Mueller, P., Schile-Beers, L.M., Mozdzer, T.J., Chmura, G.L., Dinter, T., Kuzyakov, Y., De Groot, A. V.,  
349 Esselink, P., Smit, C., D'Alpaos, A., Ibáñez, C., Lazarus, M., Neumeier, U., Johnson, B.J., Baldwin,  
350 A.H., Yarwood, S.A., Montemayor, D.I., Yang, Z., Wu, J., Jensen, K., Nolte, S., 2018. Global-change  
351 effects on early-stage decomposition processes in tidal wetlands-implications from a global survey  
352 using standardized litter. *Biogeosciences* 15, 3189–3202. <https://doi.org/10.5194/bg-15-3189-2018>
- 353 Neiff, A.P. de, Jose Neiff, J., Casco, S.L., 2006. Leaf litter decomposition in three wetland types of the  
354 Parana river floodplain. *Wetlands* 26, 558–566.
- 355 Peralta-Maraver, I., Perkins, D.M., Thompson, M.S.A., Fussmann, K., Reiss, J., Robertson, A.L., 2019.

- 356 Comparing biotic drivers of litter breakdown across stream compartments. *J. Anim. Ecol.* 88, 1146–  
357 1157. <https://doi.org/10.1111/1365-2656.13000>
- 358 Petraglia, A., Cacciatori, C., Chelli, S., Fenu, G., Calderisi, G., Gargano, D., Abeli, T., Orsenigo, S.,  
359 Carbognani, M., 2019. Litter decomposition: effects of temperature driven by soil moisture and  
360 vegetation type. *Plant Soil* 435, 187–200. <https://doi.org/10.1007/s11104-018-3889-x>
- 361 R Core Team, 2019. R: A language and environment for statistical computing. Statistical, R Foundation for  
362 Computing, Vienna, Austria. URL <https://www.R-project.org/>.
- 363 Santschi, F., Gounand, I., Harvey, E., Altermatt, F., 2018. Leaf litter diversity and structure of microbial  
364 decomposer communities modulate litter decomposition in aquatic systems. *Funct. Ecol.* 32, 522–  
365 532. <https://doi.org/10.1111/1365-2435.12980>
- 366 Seelen, L.M.S., Flaim, G., Keuskamp, J., Teurlinx, S., Arias Font, R., Tolunay, D., Fránková, M.,  
367 Šumberová, K., Temponeras, M., Lenhardt, M., Jennings, E., de Senerpont Domis, L.N., 2019. An  
368 affordable and reliable assessment of aquatic decomposition: Tailoring the Tea Bag Index to surface  
369 waters. *Water Res.* 151, 31–43. <https://doi.org/10.1016/j.watres.2018.11.081>
- 370 Tummers, B., 2006. DataThief III Available at: <http://datathief.org/>.
- 371 Webster, J.R., Benfield, E.F., 1986. Vascular plant breakdown in freshwater ecosystems. *Annu. Rev. Ecol.*  
372 *Syst.* Vol. 17 567–594. <https://doi.org/10.1146/annurev.es.17.110186.003031>
- 373 Woodward, G., Gessner, M.O., Giller, P.S., Gulis, V., Hladyz, S., Lecerf, A., Malmqvist, B., McKie, B.G.,  
374 Tiegs, S.D., Cariss, H., Dobson, M., Elozegi, A., Ferreira, V., Graça, M.A.S., Fleituch, T., Lacoursière,  
375 J.O., Nistorescu, M., Pozo, J., Risnoveanu, G., Schindler, M., Vadineanu, A., Vought, L.B.M.,  
376 Chauvet, E., 2012. Continental-scale effects of nutrient pollution on stream ecosystem functioning.  
377 *Science* (80-. ). 336, 1438–1440. <https://doi.org/10.1126/science.1219534>
- 378 Young, R.G., Matthaei, C.D., Townsend, C.R., 2008. Organic matter breakdown and ecosystem  
379 metabolism: Functional indicators for assessing river ecosystem health. *J. North Am. Benthol. Soc.*  
380 27, 605–625. <https://doi.org/10.1899/07-121.1>
- 381 Yousefi Lalimi, F., Silvestri, S., D’Alpaos, A., Roner, M., Marani, M., 2018. The Spatial Variability of  
382 Organic Matter and Decomposition Processes at the Marsh Scale. *J. Geophys. Res. Biogeosciences*  
383 123, 3713–3727. <https://doi.org/10.1029/2017JG004211>
- 384

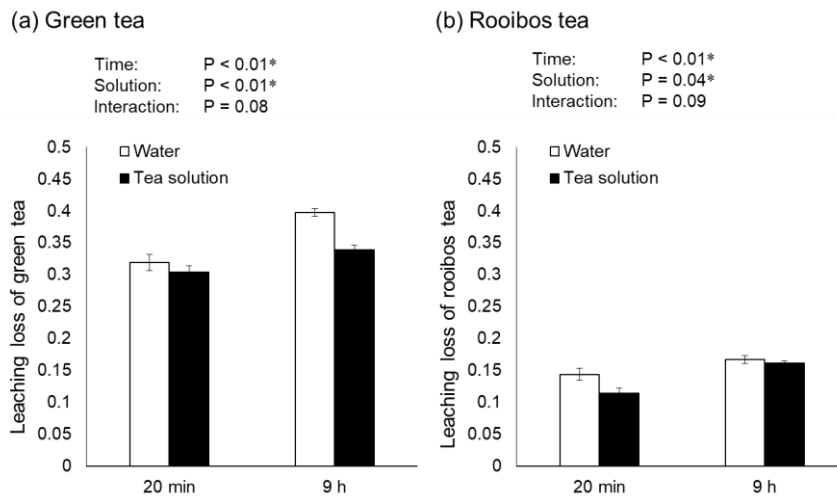

385

386 **Fig. 1.** Relationships between solute concentration and the leaching ability of (a) green tea and (b)  
387 rooibos tea. Leaching losses were compared between deionized water and a tea solution for each tea  
388 type. Error bars indicate the standard error of three replicates.

389

390

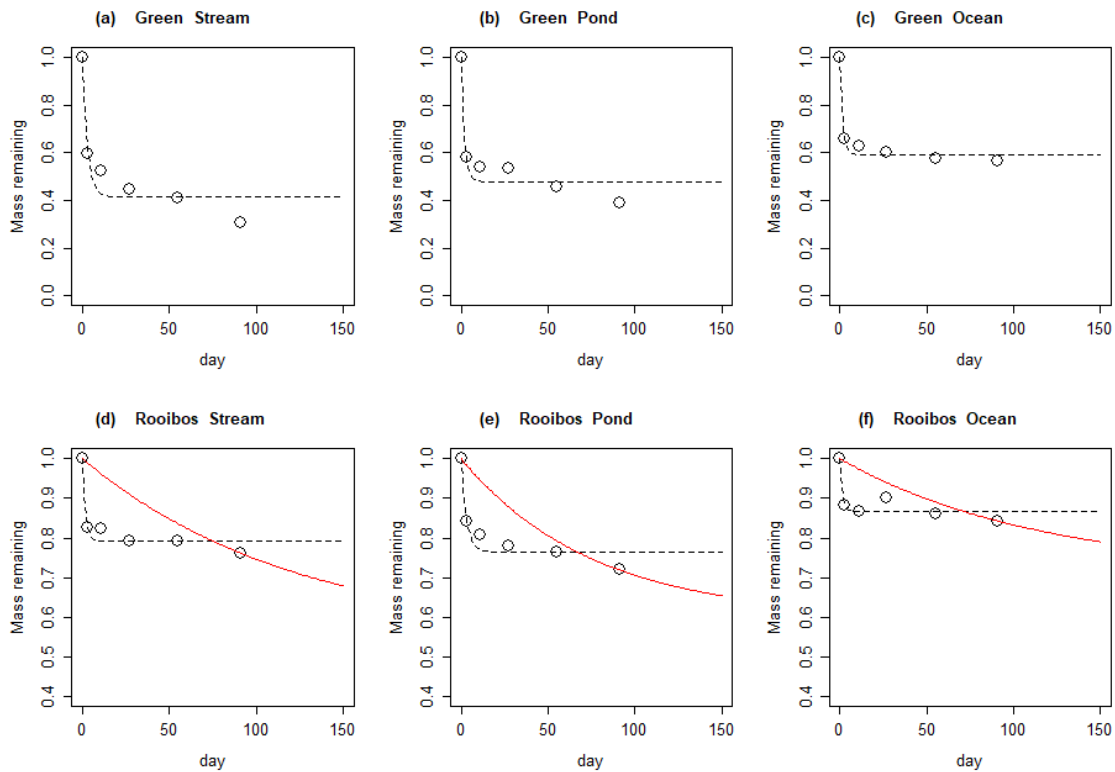

391

392

393

394

395

396

397

398

399

400

**Fig. 2.** Relative remaining masses of green (a–c) and rooibos (d–f) tea bags in water samples taken from a stream (a, d), pond (b, e), and ocean (c, f) in Kumamoto, Japan. Open circles represent the average of four replicates. Tea bags were incubated in the dark and retrieved at 0, 3, 11, 27, 55, and 91 days after the start of the incubation. Dashed lines indicate the associated asymptote model:  $W(t) = a * e^{-kt} + (1-a)$ , where  $W(t)$  is the mass remaining after incubation time  $t$ ,  $k$  is a decomposition constant,  $a$  is the decomposable and  $1-a$  is the un-decomposable fraction of the teas. Solid red lines indicate the asymptote models describing rooibos tea decomposition, as determined by the TBI.

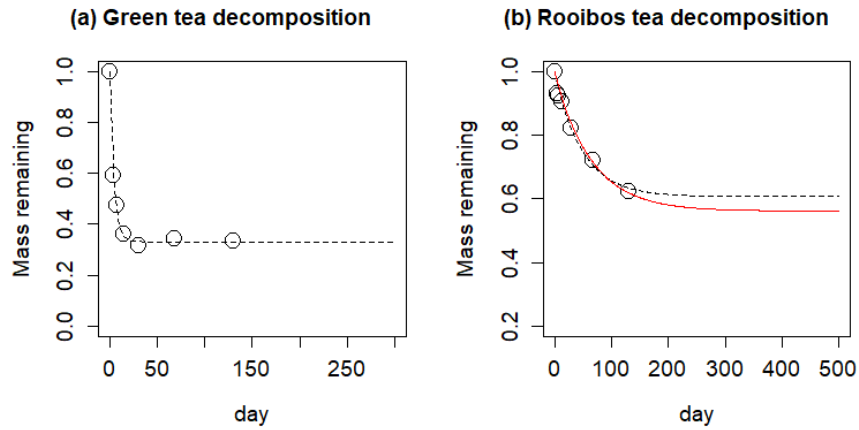

401

402

403

404

405

406

407

**Fig. 3.** Relative remaining masses of (a) green and (b) rooibos teas in a terrestrial system. Data were obtained from Keuskamp et al. (2013) using Data Thief 3.0 (Tummers, 2006). Tea bags were incubated at 25°C in the dark for 0, 4, 7, 14, 30, 68, and 130 days. Dashed lines indicate asymptote models (reported by Keuskamp et al. 2013) see Fig. 2. The solid red line indicates the TBI-based model.

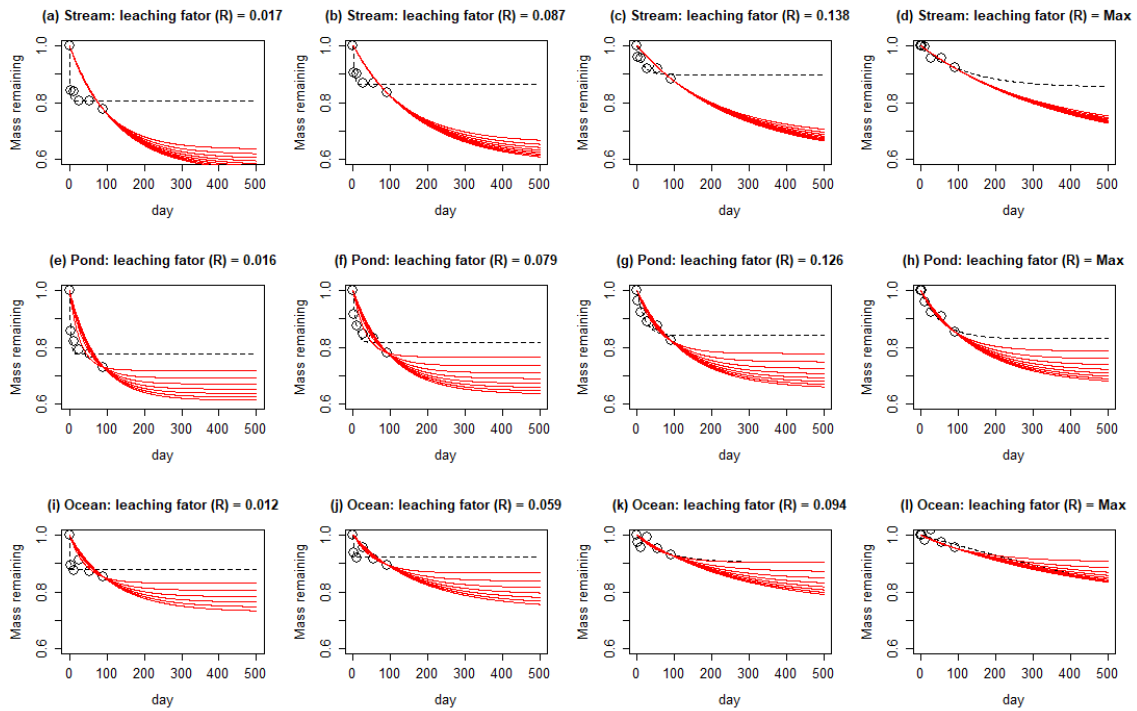

408

409

410

411

412

413

414

415

416

417

418

419

**Fig. 4.** Leaching factor correction scenarios for the TBI-based asymptote model. Multiple scenarios with different leaching factors were tested. The remaining-mass values of rooibos tea at 0, 3, 11, 27, 55, and 91 days after the start of incubation are shown, assuming 10% (a, e, i), 50% (b, f, j), 80% (c, g, k), and 100% (d, h, l) of the maximum leaching factor of rooibos tea. Dashed lines indicate asymptote models. Solid red lines indicate TBI-based asymptote models, assuming 0%, 12.5%, 25%, 37.5%, 50%, 62.5%, 75%, 87.5%, and 100% of the maximum leaching factor of green tea. Water samples were obtained from a stream (a–d), pond (e–h), and ocean (i–l) in Kumamoto Prefecture, Japan. R indicates the leaching factor for rooibos tea.



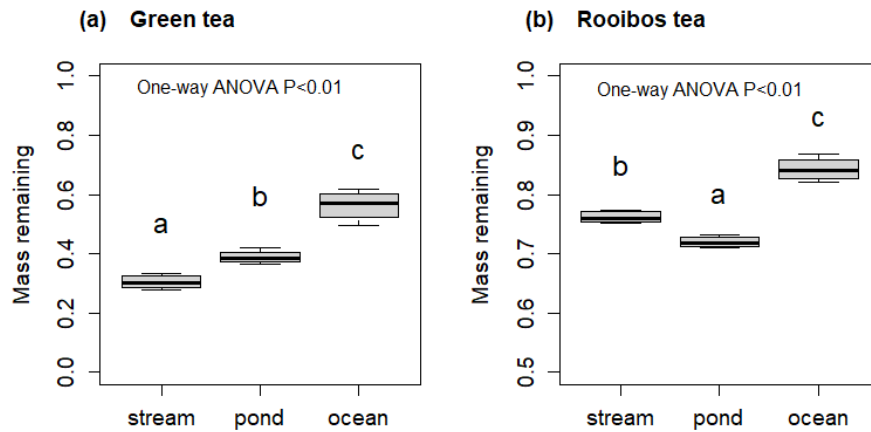

420

421 **Fig. 5.** Boxplots representing the remaining mass values of (a) green and (b) rooibos tea bags at the

422 end of a 91-day incubation period. Amounts relative to initial weights are shown. Letters indicate

423 significant differences among groups, as determined by Tukey's post hoc tests.

424

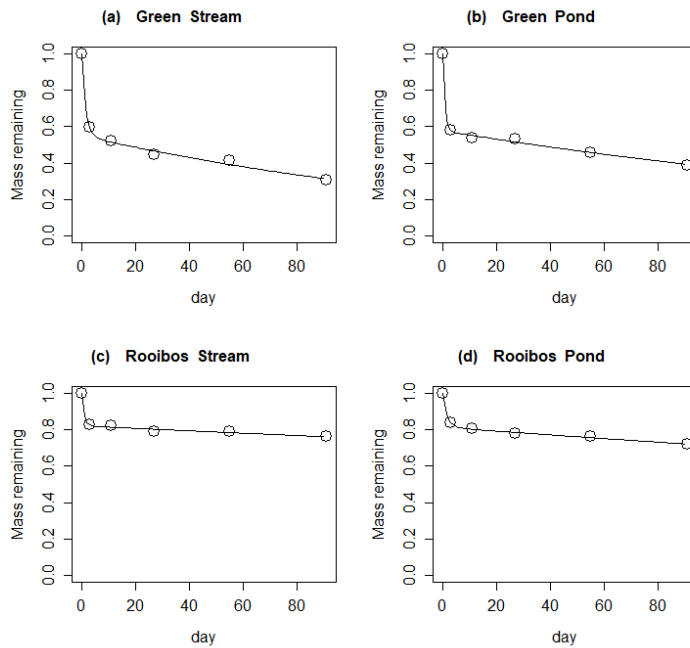

425

426 **Fig. 6.** Time series data of green (a, b) and rooibos (c, d) teas in water samples taken from a stream (a,  
427 c) and pond (b, d) in Kumamoto, Japan. Solid lines indicate double exponential models:  $W(t) = a * e^{-k_1 t} + b * e^{-k_2 t}$ , where  $W(t)$  is the mass remaining after incubation time  $t$ ,  $k_1$  and  $k_2$  are decomposition  
428 constants, and  $a$  and  $b$  represent organic matter fractions differing in decomposability. Each open circle  
429 represents the average of four replicates. Tea bags were incubated in the dark and retrieved at 0, 3, 11,  
430 27, 55, and 91 days after the start of the incubation.  
431

432

433

434

435

436 Supplemental materials

437

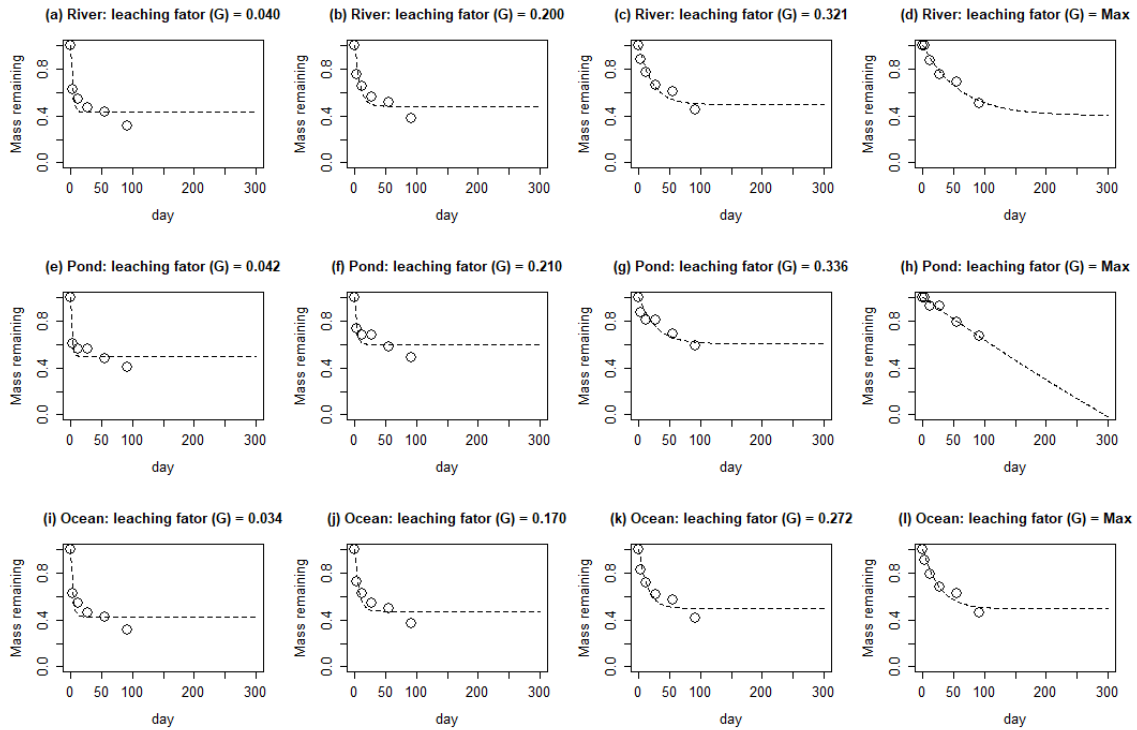

438

439

440

441

442

443

444

445

**Fig. S1.** Leaching factor scenarios applied to time-series green tea decomposition data. The remaining-mass values of green tea at 0, 3, 11, 27, 55, and 91 days after the start of the incubation are shown, assuming 10% (a, e, i), 50% (b, f, j), 80% (c, g, k), and 100% (d, h, l) of the maximum leaching factor of green tea. Dashed lines indicate asymptote models. Data were obtained from a stream (a–d), pond (e–h), and ocean (i–l) in Kumamoto Prefecture, Japan.  $G$  indicates the leaching factor of green tea.
